# Supplementary material for: Paramagnetic dithiolene complexes as metallo-ligands: ether/thioether coordination
Source: Royal Society of Chemistry journal article supplement (doi:10.1039/c1dt12028j), 2011-12-06
Supplement: c1dt12028j.pdf [file c1dt12028j.pdf]

## Paramagnetic Dithiolene Complexes as Metallo-ligands: Ether/Thioether Coordination

Alessia Famengo, Dalice Pinero, Olivier Jeannin, Thierry Guizouarn, and Marc Fourmigué

### SUPPLEMENTARY MATERIAL

#### Syntheses

*Dithiocarbonate 3b*. The trithiocarbonate<sup>i</sup> **3a** (0.3130 g, 1.16 mmol) is added to a solution of mercuric acetate (0.8070 g, 2.54 mmol) in a mixture of CH<sub>3</sub>COOH/CHCl<sub>3</sub> (3/1 v/v, 17.0 ml) and the solution stirred for 2.5h at rt. The white suspension is filtered on Celite and the filtrate evaporated under vacuum to afford a white solid, dissolved in CHCl<sub>3</sub>. The chloroform solution is extracted with H<sub>2</sub>O, dried on MgSO<sub>4</sub> and concentrated, affording **3b** as white crystals (0.2447 g, yield 85%), m.p. 137–138°C (Litt.<sup>ii</sup> 138–140°C). <sup>1</sup>H NMR (CDCl<sub>3</sub>, TMS) δ: 4.05 (t, 2H); 2.98 (t, 2H) ppm. IR (KBr) ν<sub>C=O</sub> = 1658 cm<sup>-1</sup>. Elem. Anal. Calc. for C<sub>7</sub>H<sub>8</sub>O<sub>2</sub>S<sub>4</sub> (Found) : 33.31 (33.20), 3.19 (3.22) %.

*(nBu<sub>4</sub>N)(1)•DMF*. To a solution of dithiocarbonate **3b** (0.1179 g, 0.48 mmol) in distilled MeOH (20 ml) is added Bu<sub>4</sub>NOH 1M (1.05 ml, 1.05 mmol). After stirring for 1h, NiCl<sub>2</sub>•6H<sub>2</sub>O (55.6 mg, 0.24 mmol) is added. The suspension is stirred for 10 mn and filtered. The brown solid is washed with MeOH and dried. It is soluble in CH<sub>3</sub>CN, CH<sub>2</sub>Cl<sub>2</sub> and DMF. Recrystallization by Et<sub>2</sub>O vapour diffusion on a DMF solution afforded the *n*Bu<sub>4</sub>N<sup>+</sup> salt as DMF solvate, *(n*Bu<sub>4</sub>N)(1)•DMF (0.195 g, 75%). Elem. Anal. Found: C, 45.32; H, 7.18; N, 2.95. C<sub>31</sub>H<sub>59</sub>N<sub>2</sub>NiO<sub>3</sub>S<sub>8</sub> (MW = 823.04 g/mol) requires C, 45.24; H, 7.23, N, 3.40 %. UV-vis (CH<sub>2</sub>Cl<sub>2</sub>): λ<sub>max</sub> = 900 nm.

*[Ni(DMF)<sub>6</sub>][1]<sub>2</sub>*. A solution a *(n*Bu<sub>4</sub>N)(1)•DMF (10.0 mg, 0.012 mmol) in CH<sub>3</sub>CN (2.0 ml) is added to a solution of Ni(ClO<sub>4</sub>)<sub>2</sub>•6H<sub>2</sub>O (31.3 mg, 0.08 mmol) in CH<sub>3</sub>CN (2.0 ml) and left unstirred for one day. The black precipitate is filtered and washed with CH<sub>3</sub>CN. Recrystallization by Et<sub>2</sub>O vapour diffusion on a DMF solution afforded needle-shaped crystals which analyse as [Ni(DMF)<sub>6</sub>][1]<sub>2</sub>. Elem. Anal. Found: C, 33.24; H, 4.86; N, 5.48. C<sub>42</sub>H<sub>70</sub>N<sub>6</sub>Ni<sub>3</sub>O<sub>10</sub>S<sub>16</sub> (MW = 1508.1780 g/mol) requires C, 33.45; H, 4.68; N, 5.57 %.

$[NiCl(DMF)_2][1] \cdot (2DMF, Et_2O)$ . A solution of  $(nBu_4N)(1) \cdot DMF$  (10.0 mg, 0.012 mmol) in  $CH_3CN$  (2 ml) is mixed with a solution of  $NiCl_2 \cdot 6H_2O$  (10.5 mg, 0.042 mmol) in MeOH (0.5 ml). The filtered solution was left for two days while a black precipitate appears. The black precipitate is filtered and washed with  $CH_3CN$ . Recrystallization by  $Et_2O$  vapour diffusion on a DMF solution afforded prismatic crystals (11.4 mg, 55%), identified from X-ray diffraction as a DMF/ $Et_2O$  solvate formulated as  $[NiCl(DMF)_2][1] \cdot (2DMF, Et_2O)$ . Elem. Anal. Found: C, 32.45; H, 5.16; N, 6.04, compatible with the loss of  $Et_2O$  molecule.  $[NiCl(DMF)_2][1] \cdot 2DMF$ :  $C_{24}H_{44}ClN_4Ni_2O_6S_8$  (MW = 893.9976 g/mol) requires C, 32.24; H, 4.96; N, 6.27 %.

*X-ray Diffraction Studies.* Data were collected on a Nonius KappaCCD or APEXII Bruker AXS Diffractometers with graphite-monochromated Mo- $K\alpha$  radiation ( $\lambda = 0.71073 \text{ \AA}$ ). Structures were solved by direct methods (SHELXS-97, SIR97)<sup>iii</sup> and refined (SHELXL-97) by full-matrix least-squares methods,<sup>iv</sup> as implemented in the WinGX software package.<sup>v</sup> Absorption corrections were applied. Hydrogen atoms were introduced at calculated positions (riding model), included in structure factor calculations, and not refined.

*Magnetic properties.* The magnetic susceptibility measurements were obtained from a Quantum Design SQUID magnetometer MPMS-XL. This magnetometer works between 1.8 and 400 K for dc applied fields ranging from -5 to 5 T. Measurements were performed on polycrystalline samples of  $[Ni(DMF)_6](1)_2$  (3.6 mg) and  $[NiCl(DMF)_2](1)$  (2.2 mg). The magnetic data were corrected for the sample holder and the diamagnetic contributions.

---

<sup>i</sup> (a) T. K. Hansen, T. Jørgensen, P. C. Stein, J. Becher, *J. Org. Chem.* **1992**, *57*, 6403; (b) T.

K. Hansen, T. Jørgensen, J. Becher, *J. Chem. Soc. Chem. Commun.*, **1992**, 1550

<sup>ii</sup> M. Wagner, R.-M. Olk, E. Hoyer, *J. Prakt. Chem.* **1994**, *336*, 177.

<sup>iii</sup> A. Altomare, M. C. Burla, M. Camalli, G. Cascarano, C. Giacovazzo, A. Guagliardi, A. G. G. Moliterni, G. Polidori, R. Spagna, *J. Appl. Cryst.* **1999**, *32*, 115.

<sup>iv</sup> SHELX97 - Programs for Crystal Structure Analysis (Release 97-2). G. M. Sheldrick, (1998).

<sup>v</sup> L. J. Farrugia, *J. Appl. Cryst.* **1999**, *32*, 837.
